# Supplementary material
Source: PubMed Central journal article supplement (PMC3744093)
Supplement: NIHMS399026-supplement-Suppl_Table_1.pdf [file NIHMS399026-supplement-Suppl_Table_1.pdf]

**Table S1. Primers used in the study**

| <b>Gene</b>                       | <b>Forward</b>                 | <b>Reverse</b>                 |
|-----------------------------------|--------------------------------|--------------------------------|
| <b>Mouse primers</b>              |                                |                                |
| CHOP                              | ATATCTCATCCCCAGGAAACG          | TCTTCCTTGCTCTTCCTCCTC          |
| ERdj4                             | CTTAGGTGTGCCAAAAGTCTGC         | GGCATCCGAGAGTGTTCATA           |
| EDEM1                             | GGACCAAGAGGAAAAGTTTG           | GAGGTGAGCAGGTCAAATCAA          |
| GRP94                             | CTCAGAAGACGCAGAAGACTCA         | AAAAC TTCACATTCCTCTCCA         |
| Grp78                             | TGTGGTACCCACCAAGAAGTC          | TTCAGCTGTCACTCGGAGAAT          |
| IRE1- $\alpha$                    | CTGTGGTCAAGATGGACTGG           | GAAGCGGGAAGTGAAGTAGC           |
| ATF4                              | CGAGATGAGCTTCCTGAACAGC         | GGAAAAGGCATCCTCCTTGC           |
| PPAR- $\gamma$                    | TGAAAGAAGCGGTGAACCACTG         | TGGCATCTCTGTGTCAACCATG         |
| PPAR- $\alpha$                    | ACGATGCTGTCTCCTTGATG           | GTGTGATAAAGCCATTGCCGT          |
| HMGCS1                            | CCAAAAGATGTGGGAATCGTTGCC       | ATCCCAAGAGCTGGATTCCGACC        |
| SREBP-1C                          | ACGGAGCCATGGATTGCACATTTG       | AGGCTGTAGGATGGTGAGTGG          |
| FAS                               | AAGCTCAGTGTGCCACCTA            | ATGGCAACGTGACACTGCTG           |
| PTP1B                             | TTTCAAAGTCCGAGAGTCAGGG         | AGCCAGACAGAAGGTTCCAGA          |
| HMGC-Red                          | Gattctggcagtcagtgaggaa         | gtttagccgcctatgctcc            |
| GADD34                            | GAGGGACGCCACAACCTTC            | TTACCAGAGACAGGGGTAGGT          |
| <b>Human primers</b>              |                                |                                |
| CHOP                              | TCGAGCGCCTGACCAGGGAA           | TCCAAGCCTTCCCCCTGCGT           |
| GRP94                             | CGCGGCTGGAGGTGTGAGG            | CCCGAAGGTCAGCAGGACGC           |
| ATF4                              | CGGGACGCGTGGTCTTTGCT           | GGGGTCCGAGGGCTGTAGGG           |
| BIP (GRP78)                       | GCCTGTGGCTGGACTGCCTG           | ACGCCGACGCAGGAGTAGGT           |
| ERDJ4                             | TGGCTGAGAGGGGACTGGGC           | CCACAGAGCTGAGGCGCTGG           |
| GADD34                            | TCCTCTGGCAATCCCCCATA           | GGAAGTGTGGTTTTTCAGCC           |
| PTP1B                             | GCAATGAAGGAGAAGGAGACCC         | TAGAAGGCGTGTAGGCAGATGG         |
| Reverse transcription-PCR primers |                                |                                |
| Human XBP-1                       | 5'-AAACAGAGTAGCAGCTCAGACTGC-3' | 5'-TCCTTCTGGGTAGACCTCTGGGAG-3' |
